# Supplementary material for: Identification of astroglia-like cardiac nexus glia that are critical regulators of cardiac development and function
Source: PLoS Biol. 2021 Nov 18;19(11):e3001444. doi: 10.1371/journal.pbio.3001444 (PMC8601506; doi:10.1371/journal.pbio.3001444)
Supplement: S1 Data — All raw data and statistical values represented in different spreadsheet tabs per figure panel. (XLSX) [file pbio.3001444.s011.xlsx]

## Sheet: Fig 1C
GFAP process length by type
		Length (um)
	Heart #	Type 1	Type 2	Type 3
	1	80.914	22.37	27.928
	2	62.973	21.458	26.309
	3	82.488	26.23	28.337
	4	68.154	26.94	27.735
	5	63.859	23.739	24.009
	6	74.897	25.335
	7	63.551	28.098
	8	78.176	22.118
	9	67.098	26.649
	10	69.437	24.522

## Sheet: Fig 1D
GFAP process number by type
		Number of Processes
	Heart #	Type 1	Type 2	Type 3
	1	5	2	4
	2	8	2	5
	3	11	2	5
	4	10	2	4
	5	7	2	5

## Sheet: Fig 2D
Percentage of gfap cells that express slc1a3b or glutamine synthetase
		Percentage of Cells (%)
	Heart #	slc1a3b:nls-tdTomato+	GS+
	1	100	11.1111
	2	75	7.14286
	3	83.3333	38.4615
	4	45.4545	23.5294
	5	70	14.2857
	6	100
	7	90
	8	83.3333
	9	100
	10	66.6667
	11	78.5714
	Age	Heart Number	Total number of gfap:nucGFP+ cells	Number of gfap:nucGFP+/slc1a3b:nls-tdTomato+ cells
	6 dpf	1	32	32
	6 dpf	2	4	3
	6 dpf	3	12	10
	6 dpf	4	11	5
	6 dpf	5	10	7
	6 dpf	6	6	6
	6 dpf	7	10	9
	6 dpf	8	6	5
	6 dpf	9	7	7
	6 dpf	10	12	8
	6 dpf	11	14	11
	Age	Heart Number	Total number of gfap:nucGFP+ cells	Number of gfap:nucGFP+/Glutamine Synthetase+ cells
	6 dpf	1	18	2
	6 dpf	2	14	1
	6 dpf	3	13	5
	6 dpf	4	17	4
	6 dpf	5	14	2

## Sheet: Fig 2E
Percentage of slc1a3b or glutamine synthetase cells that express gfap
		Percentage of Cells (%)
	Heart #	slc1a3b:nls-tdTomato+	GS+
	1	100	66.6667
	2	60	100
	3	90.9091	100
	4	62.5	100
	5	87.5	100
	6	85.7143
	7	100
	8	100
	9	87.5
	10	88.8889
	11	84.6154

## Sheet: Fig 2I
Percentage of gfap cells that express MEF-2A
		Percentage of Cells (%)
	Heart #	6 dpf	Adult
	1	8	9
	2	7	0
	3	4	0
	4	0	0
	5	0	0
	6	0
	7	0
	8	0
	9	0
	10	0
	11	0
	12	0
	13	0
	14	0
	15	0
	16	0
	17	0
	18	0
	19	0
	20	0
	21	0
	Age	Heart Number	Total number of gfap:nucGFP+ cells	Number of gfap:nucGFP+/Mef-2A+ cells
	6 dpf	1	12	0
	6 dpf	2	5	0
	6 dpf	3	16	0
	6 dpf	4	6	0
	6 dpf	5	5	0
	6 dpf	6	7	0
	6 dpf	7	12	0
	6 dpf	8	13	1
	6 dpf	9	7	0
	6 dpf	10	9	0
	6 dpf	11	8	0
	6 dpf	12	11	0
	6 dpf	13	3	0
	6 dpf	14	13	0
	6 dpf	15	15	1
	6 dpf	16	12	0
	6 dpf	17	6	0
	6 dpf	18	24	1
	6 dpf	19	6	0
	6 dpf	20	16	0
	6 dpf	21	5	0
	Adult	1	12	0
	Adult	2	11	1
	Adult	3	5	0
	Adult	4	17	0
	Adult	5	4	0

## Sheet: Fig 3B
GFAP localization with axons per branch
		Percent gfap:gfp process localization with AcTub+ axons
	Heart #	Primary Branch	Secondary Branch	Tertiary Branch
	1	100	38.1	9.1
	2	100	33.33	14.29
	3	100	60	28.75
	4	75	44.44	14.29
	5	100	66.67	25

## Sheet: Fig 3D
Representative axon and gfap intensity over distance
		Intensity (au)
	Distance	GFAP	Acetylated Tubulin
	0	1.01562	4.93244
	1	1.51949	8.83806
	2	2.59242	13.2922
	3	4.29114	14.4353
	4	7.82693	15.0608
	5	10.9146	15.3299
	6	12.0417	14.2784
	7	11.2731	10.7276
	8	6.7399	6.79265
	9	3.33857	5.31694
	10	2.20364	4.68826
	11	2.07143	4.26028

## Sheet: Fig 3F
mCherry intensity after MTZ injection
		Intensity (au)
		Heart		Retina
		Control	MTZ Treated	Control	MTZ Treated
		1.27561	0.007163	1.73694	1.38926
		1.21362	0.023166	1.68294	1.60296
		1.50069	0.115194	1.26358	1.2891
		1.49695	0.175675	1.46285	1.00284
		1.29967	0.089124	1.38757	1.17826
		1.62938	0.139271
		1.57246	0.067931
		1.83716	0.029739

## Sheet: Fig 3G
Number of axons after GFAP ablation
		Number of AcTub+ axons
	Heart #	DMSO	Injected MTZ (10mM)	Control Ablation	Laser Ablation
	1	0	6	0	7
	2	1	6	0	7
	3	0	7	0	10
	4	0	8	0	5
	5	1	8	0
	6	0	7
	7	0	6
	8	0	7

## Sheet: Fig 4C
Gfap nuclear development over time
		Number gfap:nucGFP+ cells
	Heart #	4 dpf	5 dpf	6 dpf	2 mpf
	1	2	10	14	67
	2	3	7	17	53
	3	0	8	8	48
	4	4	6	8	83
	5	3	4	11	58
	6	3	7	13	68
	7	1	9	18
	8	2	8	20
	9	4	4	7
	10	2	5	14
	11	0	7	17
	12	0	8	19
	13	3		13

[truncated: 27 more sheets: Fig 4D, Fig 4E, Fig 4F, Fig 4J, Fig 4L, Fig 4M, Fig 5D, Fig 5F, Fig 6F, Fig 6G, Fig 6H, Fig 7C, Fig 7E, Fig 7F, Fig 8A, Fig 8B, Fig 8C, Fig 8D, Fig 8E, Fig 8G …]
